# Supplementary material for: Mixed Organic and Inorganic Amendments Enhance Soil Microbial Interactions and environmental stress resistance of Tibetan Barley on Plateau Farmland
Source: Research Square preprint supplement (doi:10.21203/rs.3.rs-1632626/v1), 2022-05-13
Supplement: Supplementary file 1 [file 412daee4c207e72bf343d13a.xlsx]

## Sheet: Sheet1
Table S5 The presence of specific genes related to metabolic pathways in 18 MAGs
Pathways		Nocardioides	Sphingomonas	Luteimonas	Mesorhizobium	Pontibacter	Rhodanobacter	Altererythrobacter	Bacillus	Nitrosospira	Deinococcus	Pseudolabrys	Mycobacterium	Flexivirga	Amnibacterium	Arthrobacter	Asticcacaulis	Gaiella	Lysobacter
Carbon cycle	Chitin degradation	nagA	nagA/nagB		nagA	nagA/nagB	nagA	nagA	nagA/nagB		nagA/nagB	nagA	nagA/nagB	nagA/nagB	nagA/nagB	nagA		nagA	nagA
	Cellulose degradation
	Glycerol utilization	glpK/glpA/TPI	glpA/TPI	TPI	glpK/glpA/TPI	TPI	glpK	glpK/glpA/TPI	glpK/glpA/TPI		glpK/glpA/TPI	glpK/glpA/TPI	glpK/glpA/TPI	glpK/glpA/TPI	glpK/glpA/TPI	TPI	TPI	glpK/glpA/TPI	glpK/glpA/TPI
	Pyruvate metabolism	DLD, lpd, pdhD/aceE	PDHA, pdhA/PDHB, pdhB/aceE/acyP/ppc	DLD, lpd, pdhD/aceE/DLD, lpd, pdhD/acyP/ppc	DLD, lpd, pdhD/PDHA, pdhA/PDHB, pdhB/DLD, lpd, pdhD/acyP	PDHB, pdhB/ppc/	ppc	acyP/ppc	DLD, lpd, pdhD/PDHA, pdhA/PDHB, pdhB/aceE/DLD, lpd, pdhD/acyP/ppc		DLD, lpd, pdhD/PDHA, pdhA/aceE/DLD, lpd, pdhD/acyP/ppc	DLD, lpd, pdhD/PDHA, pdhA/PDHB, pdhB/aceE/DLD, lpd, pdhD/acyP	DLD, lpd, pdhD/aceE/DLD, lpd, pdhD/acyP/ppc	DLD, lpd, pdhD/aceE/DLD, lpd, pdhD/ppc	DLD, lpd, pdhD/aceE/DLD, lpd, pdhD/acyP	DLD, lpd, pdhD/PDHA, pdhA/PDHB, pdhB/aceF,pdhC/DLD, lpd, pdhD/ppc	DLD, lpd, pdhD/PDHA, pdhA/PDHB, pdhB	DLD, lpd, pdhD/aceE/DLD, lpd, pdhD/ppc	aceE/acyP/ppc
	Lactate metabolism		LDH, ldh/dld		LDHD, dld	dld			LDHD, dld/dld		LDH, ldh/LDHD, dld	LDH, ldh/LDHD, dld/dld	LDH, ldh	dld
	Formate metabolism	fdoG, fdhF, fdwA/fdoH, fdsB	fdoG, fdhF, fdwA/fdoH, fdsB	fdhB	fdoG, fdhF, fdwA/fdoH, fdsB		fdoH, fdsB	fdoG, fdhF, fdwA			fdoG, fdhF, fdwA	fdoG, fdhF, fdwA/fdoH, fdsB/fdhB	fdoG, fdhF, fdwA/fdoH, fdsB	fdoG, fdhF, fdwA/fdoH, fdsB			fdoG, fdhF, fdwA	fdoH, fdsB
	Ethanol fermentation	adhP	adhP		adhP		adhP		adhP			adhP	adhP				adhP	adhP	adhP
	Acetate fermentation	pta/ackA/acyP/actP	pta/ackA/acyP/ALDH/actP	pta/acyP/ALDH	ackA/acyP/ALDH	ALDH	pta/ackA	acyP/ALDH	pta/ackA/acyP/ALDH/actP		pta/ackA/acyP/ALDH/actP	acdA/acdB/acyP/ALDH	acyP/ALDH/actP	ALDH/actP	pta/ackA/acyP/ALDH	ALDH	ackA/ALDH/actP	ALDH	acyP/ALDH
	Acetyl-CoA metabolism	accB, bccP/accD/leuA, IMS	leuA, IMS	accB, bccP/accC/accA/accD	accB, bccP/accC/accA/accD/leuA, IMS		leuA, IMS	accB, bccP/leuA, IMS	leuA, IMS		accB, bccP/accC/accA/accD/leuA, IMS	accB, bccP/accC/accA/accD/leuA, IMS	accB, bccP/leuA, IMS	leuA, IMS	leuA, IMS	accB, bccP/accC/accA/accD/leuA, IMS	accB, bccP/accC/accA/accD/leuA, IMS	accB, bccP/accC/accA/accD/leuA, IMS	accA/leuA, IMS
	CO oxidation	coxS/coxM/coxL	coxS/coxM		coxS/coxM/coxL				coxS/coxM/coxL		coxM/coxL	coxS/coxM/coxL	coxS/coxM/coxL	coxS/coxM/coxL			coxS
	Butane metabolism	fadA/paaH, hbd, fadB, mmgB/atoB	fadA/paaH, hbd, fadB, mmgB/atoB	fadA/fadN/atoB	fadA/fadN/paaH, hbd, fadB, mmgB/atoB		atoB	paaH, hbd, fadB, mmgB/atoB	fadA/paaH, hbd, fadB, mmgB/atoB		fadA/fadN/paaH, hbd, fadB, mmgB/atoB	ACADS, bcd/fadA/paaH, hbd, fadB, mmgB/atoB	fadA/paaH, hbd, fadB, mmgB/atoB	fadA/paaH, hbd, fadB, mmgB/atoB	fadA/atoB	fadA/fadN/atoB	paaH, hbd, fadB, mmgB/atoB	fadA/paaH, hbd, fadB, mmgB/atoB	fadN
	Folate C1 metabolism	metF/mthfs/metH/purH/MTHFS/fhs/glyA, SHMT/MTFMT, fmt/folD/purU/gcvT, AMT	metF/mthfs/purH/MTHFS/fhs/glyA, SHMT/MTFMT, fmt/folD/folE/purU/gcvT, AMT	metF/mthfs/purH/MTHFS/glyA, SHMT/MTFMT, fmt/folE/gcvT, AMT/gcvPA/gcvPB	metF/mthfs/metH/purH/MTHFS/fhs/glyA, SHMT/MTFMT, fmt/folD/folE/gcvT, AMT		metF/mthfs/MTFMT, fmt/folE	metF/mthfs/purH/MTHFS/glyA, SHMT/folD/gcvT, AMT/gcvPA/gcvPB	metF/mthfs/purH/MTHFS/glyA, SHMT/MTFMT, fmt/folD/folE/purU/gcvT, AMT	MTFMT, fmt/folD	mthfs/metH/purH/MTHFS/glyA, SHMT/MTFMT, fmt/folD/folE/purU/gcvT, AMT	metF/mthfs/metH/purH/MTHFS/fhs/glyA, SHMT/MTFMT, fmt/folD/folE/gcvT, AMT	mthfs/metH/purH/MTHFS/glyA, SHMT/thyX, thy1/folD/folE/purU/gcvT, AMT	metF/mthfs/metH/purH/MTHFS/glyA, SHMT/MTFMT, fmt/folD/folE/purU/gcvT, AMT	metF/mthfs/purH/MTHFS/glyA, SHMT/thyX, thy1/MTFMT, fmt/folD/folE/purU/gcvT, AMT	metF/mthfs/metH/purH/MTHFS/glyA, SHMT/MTFMT, fmt/folD/folE/gcvT, AMT/gcvPA/gcvPB	metF/mthfs/purH/MTHFS/fhs/glyA, SHMT/gcvT, AMT/gcvPB	metF/mthfs/metH/purH/MTHFS/glyA, SHMT/MTFMT, fmt/folD/purU/gcvT, AMT/gcvPA/gcvPB	metF/mthfs/metH/purH/MTHFS/glyA, SHMT/MTFMT, fmt/folD/folE
	Fatty acid biosynthesis	accB, bccP/accD/fadD/fabF/fabG/fabH	fadD/fabF/fabG/fabH	accB, bccP/accC/accA/accD/fadD/fabG/fabZ/fabI/fabH	accB, bccP/accC/accA/accD/fadD/fabF/fabG/fabZ/fabI/fabH	accD/fadD/fabF/fabG/fabZ/fabH	fabG/fabZ/fabH	accB, bccP/fadD/fabF/fabG/fabZ/fabI/fabH	fabF/fabG/fabH/ACSL,fadD	fabZ	accA/accD/fabF/fabG/fabZ/fabH/ACSL,fadD	accB,bccP/accC/accA/accD/fadD/fabF/fabG/fabZ/fabl/fabH	accB, bccP/fabF/fabH/ACSL,fadD	fabF/fabG/fabH	fabF/fabG/fabH/ACSL,fadD	accB, bccP/accC/accA/accD/fabF/fabG/fabZ/fabI/fabH/ACSL,fadD	accB, bccP/accC/accA/accD/fabI	accB, bccP/accC/accA/accD/fabG/fabZ/fabH	accA/fabF/fabG/fabZ/ACSL,fadD
	Lipopolysaccharide biosynthesis		gmhA, lpcA/gmhC, hldE, waaE, rfaE/gmhB	lpxB/lpxA/lpxD/lpxL, htrB/lpxK/kdtA, waaA/kdsC/kdsD, kpsF	lpxB/lpxA/lpxC/lpxD/lpxL, htrB/lpxK/kdtA, waaA/kdsB/kdsD, kpsF/gmhA, lpcA/gmhC, hldE, waaE, rfaE/gmhB/gmhD, rfaD/waaC, rfaC/waaF, rfaF	lpxC/lpxD/lpxL, htrB/kdsB/kdsC/kdsD, kpsF/gmhB/gmhD, rfaD/waaF, rfaF	lpxL, htrB/kdtA, waaA/kdsB	waaF, rfaF		lpxA/lpxD		lpxB/lpxA/lpxC/lpxD/lpxL, htrB/lpxK/kdtA, waaA/kdsB/gmhA, lpcA/gmhB	gmhA, lpcA	gmhA, lpcA/gmhC, hldE, waaE, rfaE/gmhB	gmhA, lpcA/gmhC, hldE, waaE, rfaE/gmhB/gmhD, rfaD	kdsB/kdsD, kpsF	lpxB/lpxA/lpxC/lpxD/lpxL, htrB/lpxK/kdsB/kdsD, kpsF	lpxB/lpxA/lpxD/lpxL, htrB/lpxK/kdtA, waaA/kdsB/kdsC/kdsD, kpsF	lpxB/lpxA/lpxC/lpxD/lpxL, htrB/kdtA, waaA/kdsD, kpsF
Nitrogen cycle	Dissimilatory nitrate redution	narG, narZ, nxrA/narI, narV/nirB/nirD	narH, narY, nxrB/nirB/nirD	norB	nirB/nirD	norB	norB	narG, narZ, nxrA/narH, narY, nxrB/narI, narV	narG, narZ, nxrA/narH, narY, nxrB/narI, narV/norB/nirB/nirD				narG, narZ, nxrA/narH, narY, nxrB/narI, narV/nirB/nirD	narG, narZ, nxrA/narH, narY, nxrB/narI, narV			nirB	nirB
	Assimilatory nitrate reduction	nasA	nasA		nasA			nasA	nasA			nasA/nirA	nasA	nasA		nasA	nasA	nasA
	Nitrogen fixation
	Glutamate/glutamine synthesis	gdhA/glnA, GLUL/gltB/gltD	gdhA/glnA, GLUL/gltD	glnA, GLUL	glnA, GLUL/gltB/gltD		gltB	gdhA/glnA, GLUL/gltB/gltD	gdhA/glnA, GLUL/gltB/gltD		GLUD1_2, gdhA/glnA, GLUL/gltB/gltD	glnA, GLUL/gltB/gltD	glnA, GLUL/gltB/gltD	glnA, GLUL/gltB/gltD	glnA, GLUL/gltB/gltD	glnA, GLUL/gltB/gltD	glnA, GLUL/gltB/gltD	glnA, GLUL	glnA, GLUL/gltB/gltD
	Cyanate metabolism	arcC/cynT, can	cynT, can	cynT, can	arcC/cynT, can	cynT, can	cynT, can	cynT, can	cynT, can		cynT, can	cynT, can	cynT, can	cynT, can	cynT, can	cynT, can	cynT, can	cynT, can	cynT, can
	Ammonium transporter	amt	amt	amt	amt	amt	amt	amt	amt		amt	amt	amt	amt	amt	amt	amt	amt	amt
	Nigtrogen regulation
Sulfur cycle	Assimilatory sulfate redunction	cysH/cysD/sir	cysH/cysD/sir		cysH/cysD	cysH/cysD/nrnA	cysH/cysD/cysJ		cysH/cysD/sir		sat/cysC/cysH/sir/nrnA	cysJ	sat/cysC/cysH/cysD/cysJ/sir/nrnA	sat/cysD	sat/cysD	cysH/cysD/cysJ	cysH/cysD/cysJ	cysH/cysD	cysH/cysD/cysJ
	Dissimilatory sulfate reduction					hydG					sat		sat	sat	sat
	Thiosulfate metabolism	TST, MPST, sseA/doxD	TST, MPST, sseA	TST, MPST, sseA			TST, MPST, sseA	TST, MPST, sseA	TST, MPST, sseA		TST, MPST, sseA/doxD	TST, MPST, sseA/doxD	TST, MPST, sseA	TST, MPST, sseA	TST, MPST, sseA	TST, MPST, sseA			TST, MPST, sseA
	Cycteine/serine metabolism	cysE/cysK/metX/metB	cysK/metB	cysK/metX/metB	cysE/cysK/metX		cysK/metX/metB	cysE/cysK/metX/metB	cysE/cysK/metX/metB		cysK/metX/metB	cysE/cysK/metX/metB	cysE/cysK/metX/metB	cysE/cysK/metX/metB	cysE/cysK/metX/metB	cysE/cysK/metX/metB	cysK/metX/metB	cysK/metX/metB	cysK/metX/metB
Phosphorous cycle	Pho system	phoD/phoR/phoB	phoD/phoR	phoR/phoB	phoD/phoR/phoB	phoR/phoB1, phoP	phoA/phoR/phoB	phoA/phoD/phoB	phoR	phoR	phoR/phoB/phoB1, phoP	phoR/phoB				phoR/phoB	phoD	phoB1, phoP	phoB
	Polyphosphate metabolism	ppx-gppA	ppk2/ppx-gppA	ppk2/ppx-gppA	ppk2/ppx-gppA	ppx-gppA		ppx-gppA	ppx-gppA			ppx-gppA	ppk2/ppx-gppA	ppx-gppA		ppk2/ppx-gppA	ppk2/ppx-gppA	ppx-gppA	ppx-gppA
	Phosphate transport	pstS/pstC/pstA	pstS	pstS/pstC/pstA/pstB/TC.PIT	phnD/phnE/pstS/pstC/pstA/pstB/TC.PIT	pstS/pstC/pstA	pstS	TC.PIT	pstS/pstC/pstA/pstB/TC.PIT		pstS/pstC/pstA/pstB/TC.PIT	phnD/phnE/pstS/pstC/pstA/pstB/TC.PIT	pstS/pstC/pstA/pstB/TC.PIT	pstS/pstC/pstA/pstB/TC.PIT	TC.PIT	pstS/pstC/pstA/pstB/TC.PIT	phnD/pstS/pstC/pstA/pstB/TC.PIT	pstC/pstA/pstB	pstS
	Organic phosphate metabolism	ugpQ	ugpQ		ugpQ	ugpQ	ugpQ	ugpQ	ugpQ	ugpQ	ugpQ		ugpQ	ugpQ	ugpQ		ugpQ	ugpQ	ugpQ
	others	ppa	ppa	ppa	ppa	ppa		ppa	ppa	ppa		ppa	ppa	ppa	ppa	ppa	ppa	ppa
Stress response	Heat shock proteins	clpB/clpC/clpX, CLPX/clpP/dnaJ/dnaK, HSPA9/groEL, HSPD1/groES, HSPE1/GRPE/HSP20	clpB/dnaJ/dnaK, HSPA9/groEL, HSPD1/GRPE/HSP20	clpA/clpB/HSP90A, htpG/dnaJ/dnaK, HSPA9/groES, HSPE1/GRPE	clpA/clpB/clpX, CLPX/clpP/hslU/dnaJ/dnaK, HSPA9/groEL, HSPD1/groES, HSPE1/GRPE/HSP20	clpB/clpX, CLPX/clpP/dnaJ/dnaK, HSPA9/groEL, HSPD1/groES, HSPE1/GRPE/cbpA/HSP20	clpB/hslU/groEL, HSPD1/groES, HSPE1/HSP20	clpA/clpB/clpP/dnaJ/groES, HSPE1	clpB/clpC/dnaJ/dnaK, HSPA9/groEL, HSPD1/groES, HSPE1/GRPE/HSP20	hslU/dnaJ/GRPE/HSP20	clpA/clpB/clpC/clpX, CLPX/clpP/dnaJ/groEL, HSPD1/cbpA/HSP20	clpA/clpB/clpX, CLPX/clpP/hslU/dnaJ/dnaK, HSPA9/groEL, HSPD1/groES, HSPE1/GRPE/HSP20	clpA/clpB/clpC/clpX, CLPX/clpP/HSP90A, htpG/dnaJ/dnaK, HSPA9/groEL, HSPD1/groES, HSPE1/GRPE/HSP20	clpB/clpC/clpX, CLPX/dnaJ/dnaK, HSPA9/groEL, HSPD1/groES, HSPE1/GRPE/HSP20	clpB/clpC/clpX, CLPX/clpP/dnaJ/dnaK, HSPA9/groEL, HSPD1/groES, HSPE1/GRPE/HSP20	clpA/clpB/clpX, CLPX/clpP/hslU/dnaJ/dnaK, HSPA9/groEL, HSPD1/groES, HSPE1/GRPE	clpB/clpP/dnaJ/dnaK, HSPA9/groEL, HSPD1/groES, HSPE1/GRPE	clpB/hslU/HSP90A, htpG/dnaJ/dnaK, HSPA9/groEL, HSPD1/groES, HSPE1/GRPE/cbpA/HSP20	clpA/clpB/clpC/dnaJ/GRPE/cbpA
	Heavy metal resistance	arsC/acr3	arsC/acr3/TC.PIT	arsC/acr3/TC.PIT	arsC/acr3/TC.PIT			TC.PIT	arsC/acr3/TC.PIT		arsC/acr3/TC.PIT	arsC/acr3/TC.PIT	arsC/acr3/TC.PIT	arsC/acr3/TC.PIT	arsC//TC.PIT	arsC/TC.PIT	arsC	arsC/acr3	arsC/acr3
	Osmolarity adaptation	trkH, trkG, ktrB/trkA, ktrA	betT, betS/trkH, trkG, ktrB/trkA, ktrA			betT, betS/trkH, trkG, ktrB/trkA, ktrA			trkH, trkG, ktrB/trkA, ktrA		betT, betS/trkH, trkG, ktrB/trkA, ktrA		trkH, trkG, ktrB/trkA, ktrA	trkH, trkG, ktrB/trkA, ktrA				trkA, ktrA
	Oxidative stress	trxR/trxB/prxQ	trxR/trxB/prxQ	ahpC/trxR/trxB/prxQ	trxR/trxB/prxQ	prxQ	trxR/trxB	trxR/trxB/prxQ	trxR/trxB/prxQ	trxR/trxB/prxQ	trxR/trxB/prxQ	trxR/trxB/prxQ	ahpC/trxR/trxB/prxQ	trxR/trxB/prxQ	trxR/trxB/prxQ	ahpC/trxR/trxB/prxQ	ahpC/prxQ	trxR/trxB/prxQ	prxQ
